# Supplementary material for: Quantum Dots-Sensitized High Electron Mobility Transistor (HEMT) for Sensitive NO2 Detection
Source: MDPI journal article supplement (doi:10.3390/chemosensors11040252), 2023-04-18
Supplement: s1 [file s1]

Archive with 1 entries (1 files):
- chemosensors-2332763-supplementary.pdf
