# Supplementary material for: Quantum Dots-Sensitized High Electron Mobility Transistor (HEMT) for Sensitive NO2 Detection
Source: MDPI journal article supplement (doi:10.3390/chemosensors11040252), 2023-04-18
Supplement: s1 [file s1 › chemosensors-2332763-supplementary.pdf]

Supplementary Material

# Quantum Dots-Sensitized High Electron Mobility Transistor (HEMT) for Sensitive NO<sub>2</sub> Detection

Zhixiang Hu <sup>1</sup>, Licheng Zhou <sup>1</sup>, Long Li <sup>1</sup>, Binzhou Ying <sup>1</sup>, Yunong Zhao <sup>1</sup>, Peng Wang <sup>1</sup>, Huayao Li <sup>1</sup>, Yang Zhang <sup>2,3,\*</sup> and Huan Liu <sup>1,\*</sup>

<sup>1</sup> School of Integrated Circuits, Wuhan National Laboratory for Optoelectronics, Optics Valley Laboratory, Huazhong University of Science and Technology, Wuhan 430074, China

<sup>2</sup> Key Laboratory of Semiconductor Materials Science, Institute of Semiconductors, Chinese Academy of Sciences, Beijing 100083, China

<sup>3</sup> College of Materials Science and Opto-Electronic Technology, University of Chinese Academy of Sciences, Beijing 100049, China

\* Correspondence: zhang\_yang@semi.ac.cn (Y.Z.); huan@hust.edu.cn (H.L.)

## Calculation of the Electron Mobility

The electron mobility can be calculated as follows:

$$\mu_n = \frac{L}{WC_i V_{DS}} \cdot \frac{\partial I_D}{\partial V_G} \quad (S1)$$

**Copyright:** © 2023 by the authors. Licensee MDPI, Basel, Switzerland. This article is an open access article distributed under the terms and conditions of the Creative Commons Attribution (CC BY) license (<https://creativecommons.org/licenses/by/4.0/>).

where  $W$  and  $L$  are the width and length of the gate,  $\mu_n$  is the electron mobility,  $C_i$  is the capacitance per unit area of the Al<sub>0.3</sub>Ga<sub>0.7</sub>As barrier. The aspect ratio of the channel is  $L/W = 40/200 = 0.2$ , the capacitance per unit area for the 25 nm Al<sub>0.3</sub>Ga<sub>0.7</sub>As barrier was calculated to be  $4.26 \times 10^{-3}$  F/m<sup>2</sup>, and  $\frac{\partial I_D}{\partial V_G}$  is the slope of the transfer characteristic curve in the linear region shown in Figure S2. The electron mobility was calculated to be  $4.86 \times 10^3$  cm<sup>2</sup>V<sup>-1</sup>s<sup>-1</sup> using Equation (S1).

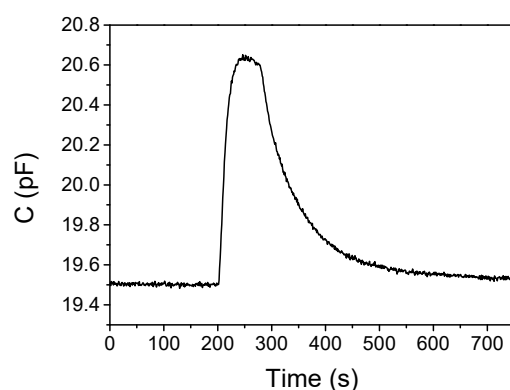

**Figure S1.** The gate-drain capacitance,  $C_{GD}$ , in response to 5 ppm NO<sub>2</sub>.

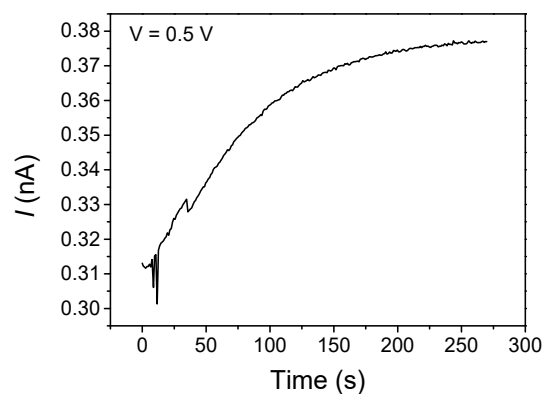

**Figure S2.** Leakage current test of the PbS CQD film.

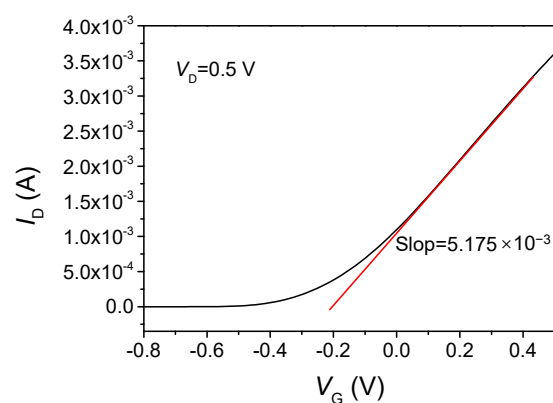

**Figure S3.**  $I_D$ - $V_G$  curve of the GaAs HEMT.

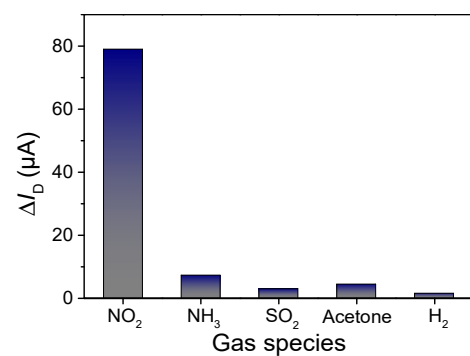

**Figure S4.** Response of the sensor to different target gases at room temperature.

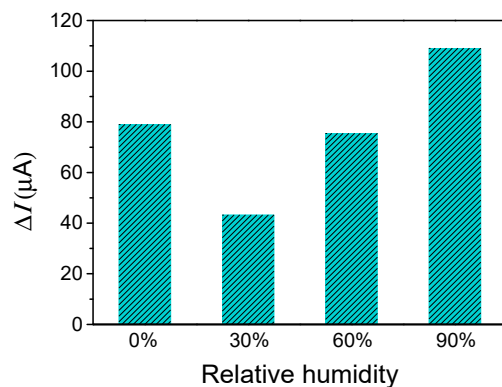

**Figure S5.** The sensor's response to 1.25 ppm  $NO_2$  was tested under relative humidity ranging from 0 to 90%.
